# Supplementary material
Source: PubMed Central journal article supplement (PMC5738736)
Supplement: JB.00362-17_zjb002184625s1.pdf [file JB.00362-17_zjb002184625s1.pdf]

**Supplemental Figures, Movie Legends, and Tables for:**

**JB00362-17**

Joseph J. Johnston, Abhishek Shrivastava, and Mark J. McBride.

**Untangling *Flavobacterium johnsoniae* gliding motility and protein secretion**

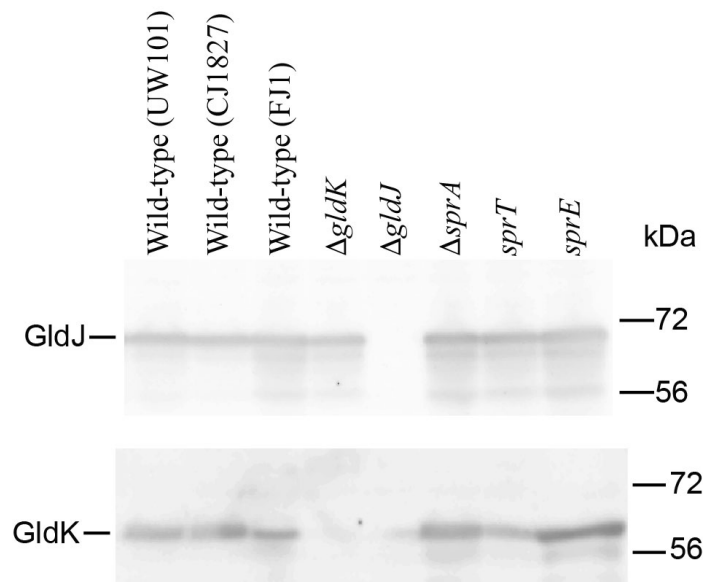

**Figure S1. Mutations in *sprA*, *E*, *T* had no effect on levels of GldJ and GldK.** GldJ and GldK in cells of wild-type or mutant *F. johnsoniae* strains were detected by western blot analyses. Whole cells were analyzed for cultures of wild type *F. johnsoniae* UW101, streptomycin resistant 'wild type' CJ1827, wild type strain FJ1,  $\Delta gldK$  mutant CJ2122,  $\Delta gldJ$  mutant CJ2360,  $\Delta sprA$  mutant CJ2302, *sprT* mutant KDF001, and *sprE* mutant FJ149. Cell samples corresponded to 15  $\mu$ g protein per lane. Samples were separated by SDS-PAGE and GldJ and GldK were detected using the appropriate antisera (Shrivastava, A, JJ Johnston, JM van Baaren, and MJ McBride. 2013. *J. Bacteriol.* **195**:3201-3212, and Braun, TF and MJ McBride. 2005. *J. Bacteriol.* **187**:2628-2637).

GldJ

Table of amino acid sequences for GldJ from 10 to 60 positions. Species include F. johnsoniae, F. psychrophilum, Ca. ochracea, Ce. algicola, Ce. lytica, Maribacter sp., Ro. biformata, Cr. atlanticus, G. forsetii, Z. profunda, W. virosa, Ri. anapestifer, Cy. hutchinsonii, L. byssohila, Sp. linguale, D. fermentans, M. tractuosa, Pe. heparinus, Pe. saltans, Ch. pinensis, Pal. propionicigenes, and O. splanchnicus.

Table of amino acid sequences for GldJ from 70 to 120 positions. Species include F. johnsoniae, F. psychrophilum, Ca. ochracea, Ce. algicola, Ce. lytica, Maribacter sp., Ro. biformata, Cr. atlanticus, G. forsetii, Z. profunda, W. virosa, Ri. anapestifer, Cy. hutchinsonii, L. byssohila, Sp. linguale, D. fermentans, M. tractuosa, Pe. heparinus, Pe. saltans, Ch. pinensis, Pal. propionicigenes, and O. splanchnicus.

Table of amino acid sequences for GldJ from 130 to 180 positions. Species include F. johnsoniae, F. psychrophilum, Ca. ochracea, Ce. algicola, Ce. lytica, Maribacter sp., Ro. biformata, Cr. atlanticus, G. forsetii, Z. profunda, W. virosa, Ri. anapestifer, Cy. hutchinsonii, L. byssohila, Sp. linguale, D. fermentans, M. tractuosa, Pe. heparinus, Pe. saltans, Ch. pinensis, Pal. propionicigenes, and O. splanchnicus.



*F. johnsoniae* GldJ K R R **K** **N** **R** G D Q L A N F K Q G **N** **G** D Y G G I A G W S D D G A D I T N A V K S Y A A N D F G L Y D M A G N V A E W V A D V  
*F. psychrophilum* GldJ S R R **S** **T** **K** G D Q L A N F K Q G **K** **G** D Y G G I A G W S D D G A D I T A P V K S Y K P N D F G L Y D M A G N V A E W V Q D V  
*Ca. ochracea* GldJ K R R **R** **T** **R** G D L L A N F K Q G **K** **G** D Y G G L **L** A G W S D D **K** **G** D I T V A V K T Y P P N D F G L Y D M A G N V A E W V A D V  
*Ce. algicola* GldJ Q R L **L** G R G D Q L A N F K Q G **K** **G** D Y G G I A G W S D D G A D I T A Q V K S Y K P N D L G L Y E M A G N V A E W V A D V  
*Ce. lytica* GldJ Q R V **G** R G D Q L A N F K Q G **K** **G** D Y G G I A G W S D D G A D I T N A V M S Y K P N D L G L Y D M A G N V S E W V A D V  
*Maribacter* sp. GldJ Q R V **G** R G D Q L A N F K Q G **K** **G** D Y G G I A G W S D D G A D I T A E V M S Y K P N D L G L Y D M A G N V A E W V A D V  
*Ro. biformata* GldJ Q R V **G** R G D Q L A N F K Q G **K** **G** D Y G G I A G W S D D G A D I T A E V K S Y K P N D L G L Y D M A G N V A E W V A D V  
*Cr. atlanticus* GldJ N R R **R** **S** **R** G D Q L A N F K Q G **D** G D Y G G I A G W S D D G A D I T A E I K T Y E P N D Y G L Y D M A G N V A E W V A D V  
*G. forsetii* GldJ D V **K** **K** **M** G D Q L A N F K Q G **D** G D Y G G I A G W S D D G A D I T A E V K S Y E S N D F G L Y D M A G N V A E W V A D V  
*Z. profunda* GldJ D L R **K** **Q** G D Q L A N F K Q G **A** G D Y G G I A G W S D D G A D I T A P V M S Y E A N D F G L Y D M A G N V A E W V A D V  
*W. virosa* GldJ K G K **T** **R** G Q Y L D N F K V G R G D Y S G I G G Y G N D G S A I T N D V R K Y Q S N D F G L F G M Y G N V A E W T A D V  
*Ri. anapestifer* GldJ K G R **N** **R** G M F L E N F K Y G R G D Y S G P A G W N N D G S P T T S D V R Q Y P S N D L G I Y G M Y G N V A E W T A D V  
*Cy. hutchinsonii* GldJ Y G K **Q** **M** G M F L A N F K R G R G D Y A G I A G K L N D G A M I T T Y I Y E F P P N D F G L Y D M A G N V A E W V A D V  
*L. byssohila* GldJ K G K **A** **R** G E M Q A N Y **K** **R** G R G D Y A G I A G R L N D **K** **Y** **Q** I T A P V Y E Y P P N D F G L Y N M A G N V A E W V Y D L  
*Sp. linguale* GldJ K G R **K** **Q** G M L A N F K R G R G D Y A G I A G R S N D G A I I T A E I Y A Y P A N D F G L Y N M A G N V A E W V Y D V  
*D. fermentans* GldJ R G R **K** **Q** G T M L A N F K R G P G D Y A G I A G K S N D G A I I T Q E I R S Y P A N D F G L Y D M A G N V A E W V Y D V  
*M. tractuosa* GldJ Y G **K** **E** **M** G Y F L A N F K R G R G D Y G G I A G K L N D G A F I T D Y I Y N F P P N D F G L Y N M A G N V A E W V W D L  
*Pe. heparinus* GldJ K K **S** **T** **R** G L I L A N F K R T K G D Y M G V G G S L N D K G S I T V N V R S Y T P N D F G L Y N M A G N V A E W V A D V  
*Pe. saltans* GldJ K K **D** **T** **R** G M V Y A N F K Q G **K** **G** **D** **N** M G V A G Y L N D G A D I T A P V R A Y V P N D F G L F N M A G N V S E W V Y D T  
*Ch. pinensis* GldJ R G A W **Q** G Q F L A N F K R G S G D N M G M A G G L N D R A S I T P G P V I A F F P N T F G I Y N M S G N V A E W V L D V  
*Pal. propionigenes* GldJ T K K **Q** **L** G Q M Q A N F V R G K G D M M G T S G T L N D K A T I T C P V D W Y F P N D F G L Y N M A G N V A E W V L D V  
*O. splanchnicus* GldJ E K **K** **H** **R** G R M M A N F T R G K G D Y M G V A G S A N D G W D Y T S P V R S F W P N D F G L Y D M A G N V A E W V A D V

*F. johnsoniae* GldJ Y R P I I D N E A N D F N Y Y R G N Q Y A K N K I G K D G K I E I V S T A T I K Y D T L S N G - - - - - K V V A  
*F. psychrophilum* GldJ Y R P M V D D E A N D F N Y Y V R G N V Y T K N K I G E D G K I E L V T S E N I K Y D T L S N G - - - - - K V I A  
*Ca. ochracea* GldJ Y R P I V D D E I T D F N Y Y R G N V Y M K H A I G E D G K Q I V V T P E N V K Y D T L M N G - - - - - K I I A  
*Ce. algicola* GldJ Y R P I V D D E V S D F N Y Y R G N I Y M K T A I G E D G K V N V I - R D S I V Y D T L P N G - - - - - K V V A  
*Ce. lytica* GldJ Y R P I V D D E I S D F N Y Y R G N I Y M K T A I G E D G K V N V L - R D S V V Y D T L P N G - - - - - K I V A  
*Maribacter* sp. GldJ Y R P I V D D E I S D F N Y Y R G N I Y M K T A I G E D G K V N I L - R D S V V Y D T L P T G - - - - - K I I A  
*Ro. biformata* GldJ Y R P I V D D E I S D F N Y Y R G N I F M K A A I G E D G K V Q V L - R D S I V Y D T L P T G - - - - - K V V A  
*Cr. atlanticus* GldJ Y R P I V D D E F N D F N Y Y R G N V Y T K N D I N E D G T V K L V T T E D I V Y D T L S N G - - - - - K I I A  
*G. forsetii* GldJ Y R P I V D D E F N D F N Y Y R G N V Y T K H A I N E D G S V K I V G T D D I V Y D T L S N G - - - - - K L V A  
*Z. profunda* GldJ Y R P I V D D E F N D F N Y Y R G N V Y T E N A I N E D G T V Q V V G V D N I K Y D T L S N G - - - - - R V V A  
*W. virosa* GldJ Y R P I I D D E A N D F N Y Y F R G N V F K T T I D D Q N G G F A K Y G E D D I E Y D T L N N G - - - - - K L V Y  
*Ri. anapestifer* GldJ Y R P I I D D E A S D F N Y Y R G N V N K Q M V K N A D G T Y T K L D G S N I T Y D T L A D G - - - - - R L V Y  
*Cy. hutchinsonii* GldJ Y R P L S F Q T F D D L N P L R R N G F L D - - - - - - - - - - - - - - - - - - - - - - - - - - - - - -  
*L. byssohila* GldJ Y R P N S Y R D F N D L N P I R R S D Y Q D - - - - - - - - - - - - - - - - - - - - - - - - - - - - - -  
*Sp. linguale* GldJ Y R P L S Y Q D V N D L N P I R R N G Y L D - - - - - - - - - - - - - - - - - - - - - - - - - - - - - -  
*D. fermentans* GldJ Y R P L S N S D V N D L N S F R R D G Y Q D - - - - - - - - - - - - - - - - - - - - - - - - - - - - - -  
*M. tractuosa* GldJ Y R P L S F Q D F E D L N P V R R D G T L D - - - - - - - - - - - - - - - - - - - - - - - - - - - - - -  
*Pe. heparinus* GldJ Y R S N T F E A A D A F N P Y R G N Y Q D K K I A D P A T G K I A - I D K Y N K P V M T D A - - - - - L Y A  
*Pe. saltans* GldJ Y R Q H S F D K V E D F S P F R G N E F L N N E Y D N N G K I V T I G K T N I P K K T A A T S G R K D A Y D L H K E K Y  
*Ch. pinensis* GldJ Y R P L N P I D G D D F N Y Y R G N K F Q T T Y M N G E S E P E - - - - - K T N - - - - - - - - - - - - - - - - -  
*Pal. propionigenes* GldJ Y R S T T T D D I A E Y N S F R G N V Y L T P I A T - - - - - G V D E L G N K T Y K I D S L G - - - - - R I A T  
*O. splanchnicus* GldJ Y R T L S F Q D M A E F N P Y R G N V F Q S P V L N E D G - - - - - - - - - - - - - - - - - - - - - - - - - - - - - - T A A P

*F. johnsoniae* GldJ R N L P G E I A Q V P V D E Q E T Y L R T N F S - T S D N I N Y R D G D K Q S R Y F D F G D S E S G S - K A D Q A - -  
*F. psychrophilum* GldJ R N K P G E I V Q V P V N E K E T Y L R Q N F D - K S N E I N Y R D G D K Q S T R F F D Y G A S E E G E A K K D E K N R  
*Ca. ochracea* GldJ R N L P G N L A T V P I D S N E T Y L R Y N F T - H S D N R S Y H D G D K S S T R N Y R N Q N D L M A E - G S E Y T N S  
*Ce. algicola* GldJ V N L P G E L K M V P V D E N E T Y L R T N F S - S S D N R G Y R D G E P G S S R F Y D R F S D D E D G - D E K K K -  
*Ce. lytica* GldJ V N L P G E I K M V A V D E E E T Y L R T N F S - S S D N R G Y R D G E P G S T R F Y D R F N E A D G D - E E N K I S -  
*Maribacter* sp. GldJ V N L P G E I K M V P V D E Q E T Y L R T N F S - S S D N R G Y R D G D P S S R F F D R F S D E D E E - D D T R K -  
*Ro. biformata* GldJ V N L P G E V K M V P V G E Q E T Y L R T N F S - S S D N R G Y R D G D P S S R F A D F Y G E D E E - P A - - - -  
*Cr. atlanticus* GldJ R D L P G E I V S V P V D E K E T Y L R T Q F S - T S D N R D F R D G D K R S T R Y Y T T F G D E E V S - D T K R - - -  
*G. forsetii* GldJ R N L P G E I A Q V P V T E E D T Y M R T N F T - E S D Q R D Y R D G D K S S R Y Y Q P F Q E T E E D - P S K R - - -  
*Z. profunda* GldJ R N L P G E I L Q K P I T E D E T Y M R T N F S - K S D N R N F R D G D K S S R Y Y Q P F Q D T D N S - K R - - - -  
*W. virosa* GldJ R G L P G S Y K K E I E Y - - - - - - - - - - - - - - - - - - - - - - - - - - - - - - D Y T N Y R D G D A M S L D T R V T T E T V A K - T S D - - -  
*Ri. anapestifer* GldJ K G L P G Q Y K R E V V K - - - - - - - - - - - - - - - - - - - - - - - - - - - - - - D K R N F R D G D F M S S L E A G Y G R E L D S A - A A K E F D -  
*Cy. hutchinsonii* GldJ - - - - - - - - - - - - - - - - - - - - - - - - - - - - - - E E K Y D K A G F Q - - - - - - - - - - - - - - - - - -  
*L. byssohila* GldJ - - - - - - - - - - - - - - - - - - - - - - - - - - - - - - E E K N Y D N A N - - - - - - - - - - - - - - - - - -  
*Sp. linguale* GldJ - - - - - - - - - - - - - - - - - - - - - - - - - - - - - - D S K N Y - - - - - - - - - - - - - - - - - -  
*D. fermentans* GldJ - - - - - - - - - - - - - - - - - - - - - - - - - - - - - - E A K N Y - - - - - - - - - - - - - - - - - -  
*M. tractuosa* GldJ - - - - - - - - - - - - - - - - - - - - - - - - - - - - - - P Q N N Y D N G A R - - - - - - - - - - - - - - - - - -  
*Pe. heparinus* GldJ K K Q T W A E K Q A A A A K P T D S L K N T Y A - - - - - D Q R G Y R D P Q S E - - - - - - - - - - - - - - - - - -  
*Pe. saltans* GldJ G N V T E E S P S T P D A K D P K M T A S P S F S S D Q R G Y L D K E N L D - - - - - - - - - - - - - - - - - -  
*Ch. pinensis* GldJ K D S L G H L K M R D Y T D E E S A N R L N Y Q - K G D V I N Y L D G D S L S N V E Y G Y G - - - - - K G - - - - - Y - - - - -  
*Pal. propionigenes* GldJ E V A K G D - - - - - - - - - - - - - - - - - - - - - - - - - - - - - - D V R N F K D G D A T S Q I D F T L N D S T G L A - S L R N - - -  
*O. splanchnicus* GldJ K D S L G R M R Y R N Q T D A E L A N R E N Y R - T A D N R N F N D G D L K S R I S G D I D W R N T E N - D R G T H D -

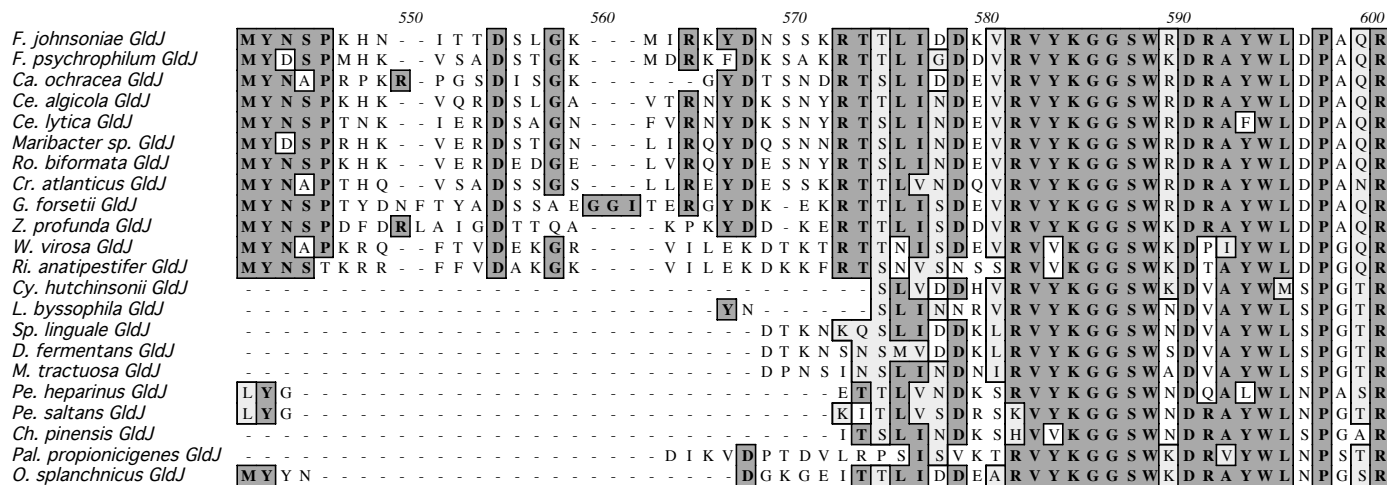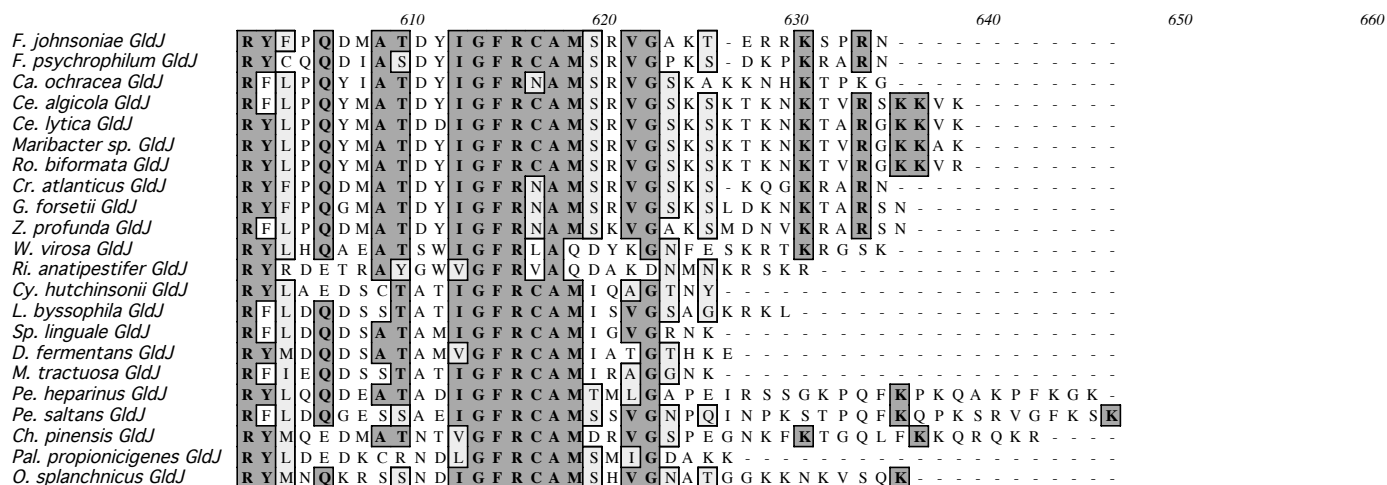

**Figure S2. Alignment of GldJ sequences using MUSCLE.** GldJ sequences from 22 members of the phylum *Bacteroidetes* were aligned using MUSCLE. Dark shading indicates identical amino acids and light shading indicates similar amino acids. Sequences used in this alignment were from *F. johnsoniae* ATCC 17061<sup>T</sup>, *Flavobacterium psychrophilum* JIP02/86, *Capnocytophaga ochracea* DSM7271<sup>T</sup>, *Cellulophaga algicola* DSM 14237<sup>T</sup>, *Cellulophaga lytica* DSM 7489<sup>T</sup>, *Maribacter* sp. HTCC2170, *Robiginitalea biformata* HTCC2501<sup>T</sup>, *Croceibacter atlanticus* HTCC2559<sup>T</sup>, 'Gramella forsetii' KT0803, *Zunongwangia profunda* SM-A87<sup>T</sup>, *Weeksella virosa*, 16922<sup>T</sup>, *Riemerella anatipestifer* DSM 15868<sup>T</sup>, *Cytophaga hutchinsonii* ATCC 33406<sup>T</sup>, *Leadbetterella byssohila* DSM 17132<sup>T</sup>, *Spirosoma linguale* DSM 74<sup>T</sup>, *Dyadobacter fermentans* DSM 18053<sup>T</sup>, *Marivirga tractuosa* DSM 4126<sup>T</sup>, *Pedobacter heparinus* DSM 2366<sup>T</sup>, *Pedobacter saltans* DSM 12145<sup>T</sup>, *Chitinophaga pinensis* DSM 2588<sup>T</sup>, *Paludibacter propionicigenes* WB4<sup>T</sup>, and *Odoribacter splanchnicus* DSM 20712<sup>T</sup>. Sequences were organized with those most similar to *F. johnsoniae* GldJ at the top and those least similar at the bottom.

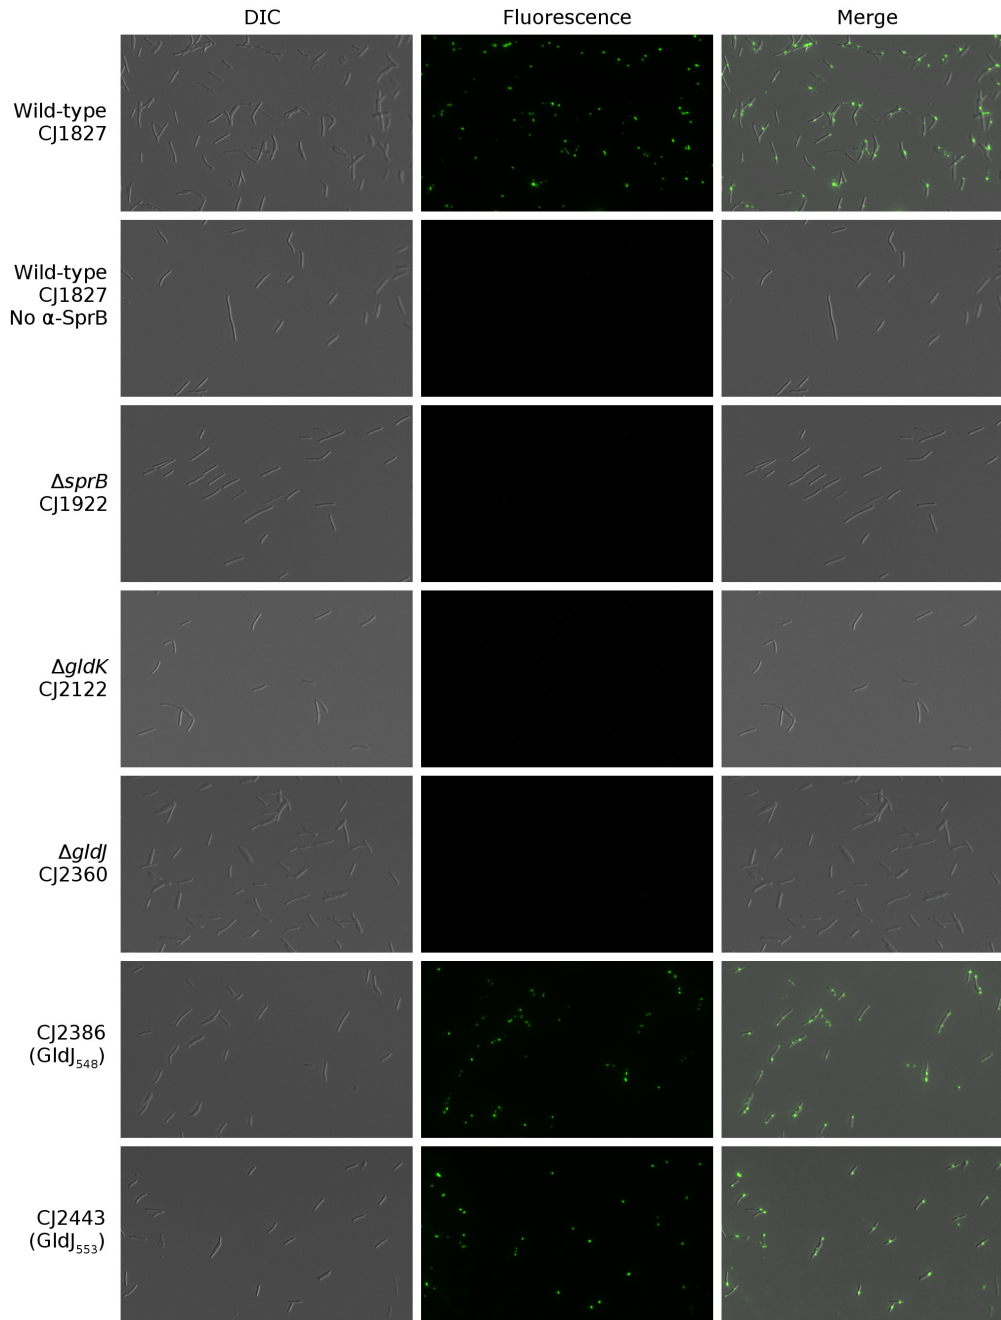

**Figure S3. Detection of surface-localized SprB by immunofluorescence labeling.** (A) Cells of wild-type and mutant *F. johnsoniae* were exposed to anti-SprB antiserum followed by F(ab')<sub>2</sub> fragment of goat anti-rabbit IgG conjugated to Alexa-488. Cells of mutants CJ2386 and CJ2443 produce truncated versions of GldJ (548 and 553 AA respectively). Images of cells were recorded by differential interference contrast microscopy (DIC; left column) and by immunofluorescence microscopy (center column) and then overlaid (right column). The same exposure time was used for all DIC images, and the same exposure time was used for all fluorescence images. 'No  $\alpha$ -SprB' indicates no primary antiserum added to this sample. Bar (lower right) indicates 10  $\mu$ m and applies to all images. The merged images correspond to those in Fig. 11 of the main text.

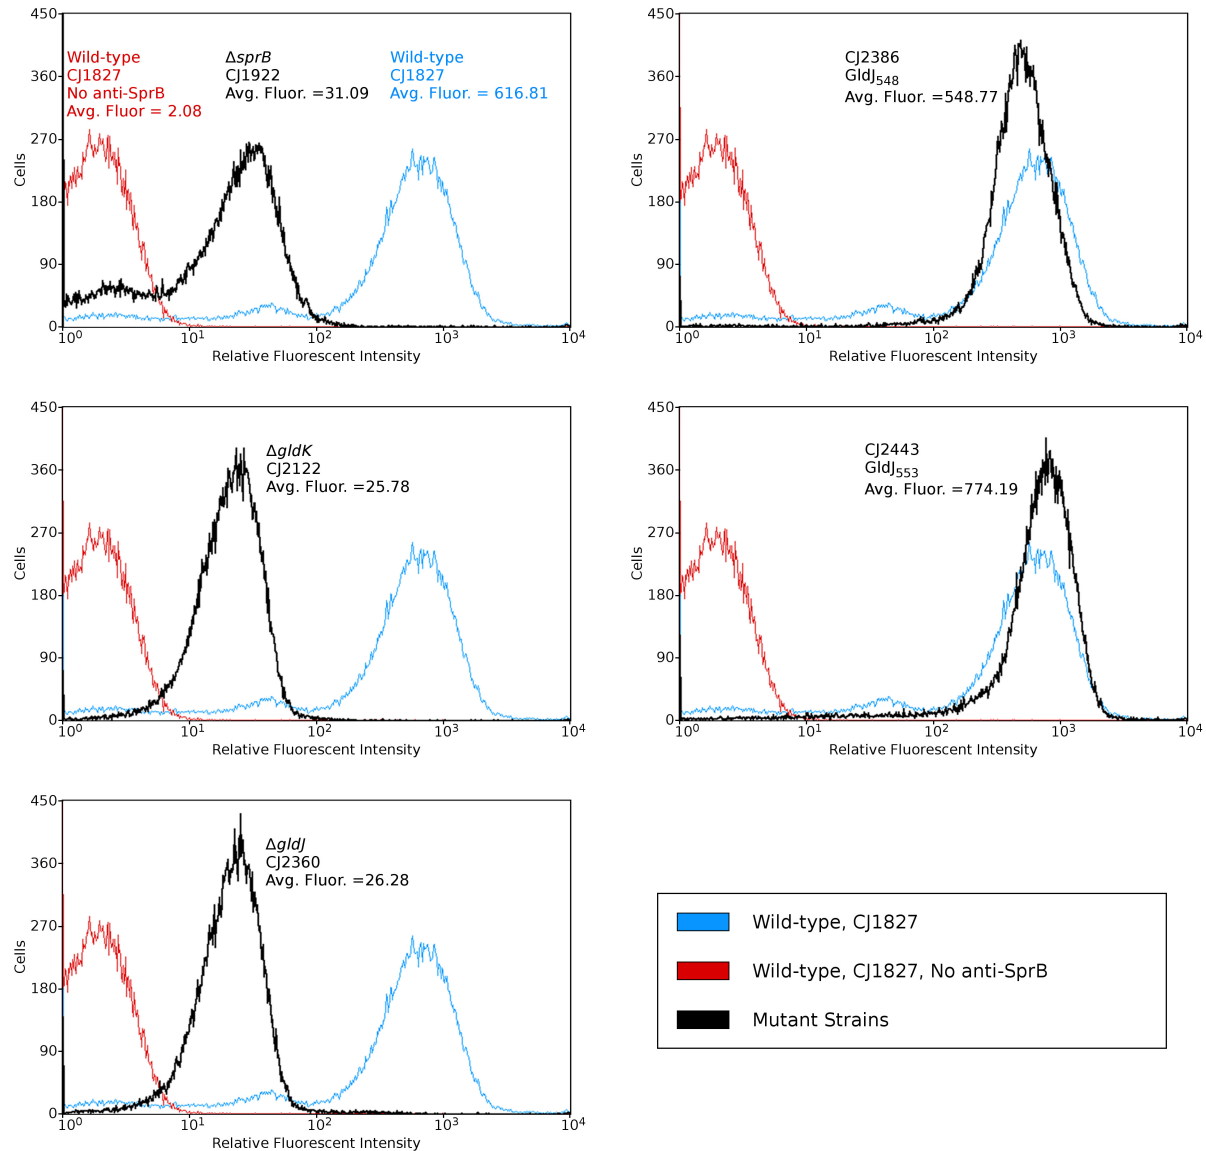

**Figure S4. Cell-surface SprB as measured by immuno-labeling and flow cytometry.** Cells were exposed to anti-SprB antiserum and F(ab') fragment of goat anti-rabbit IgG conjugated to Alexa-488 and detected by flow cytometry as described in the main text. The relative fluorescence intensities of individual cells (minimum of 49,877 cells per strain) are plotted for each strain and average fluorescence intensities of cells are indicated. Red indicates wild-type cells without anti-SprB antiserum (negative control). Blue indicates wild-type cells with anti-SprB antiserum (positive control). Black indicates individual mutants with anti-SprB antiserum as listed in each panel. The positive and negative controls are repeated in each panel to facilitate comparisons. The  $\Delta sprB$  strain (fails to make SprB) and  $\Delta gldJ$  and  $\Delta gldK$  strains (fail to secrete SprB) each had low levels of background fluorescence presumably because the rabbit anti-SprB antiserum detected other cell-surface antigens besides SprB. Less than 0.6% of cells of strains  $\Delta sprB$ ,  $\Delta gldJ$ , and  $\Delta gldK$  exhibited fluorescence above a background cutoff of 10<sup>2</sup> indicating absence of cell-surface SprB for these strains. Greater than 91% of cells of strains CJ2386 (makes truncated GldJ<sub>548</sub>) and CJ2443 (makes truncated GldJ<sub>553</sub>) exhibited fluorescence above this background cutoff indicating that nearly all cells of these mutants had SprB on their surfaces.



## Movie Legends

**Movie S1.** Movement of cells of wild-type *F. johnsoniae* UW101 (Left), *gldJ* mutant UW102-81 which produces truncated (542 AAs) GldJ (Center), and UW102-81 complemented with pMM313 that expresses full length (561 AAs) GldJ (Right) on glass cover slips. Cells in MM were introduced into tunnel slides, incubated for 5 min, and cells on the cover slip were examined using a Photometrics CoolSNAP<sub>cf</sub><sup>2</sup> camera mounted on an Olympus BH-2 phase-contrast microscope with a heated stage at 25°C. Three 30-second sequences are shown. Bar indicates 10 µm and applies to all movies. Cells of *gldJ* mutant UW102-81 (Center) failed to attach to glass and the movements seen for the cells in suspension appear to be Brownian motion rather than active motility.

**Movie S2.** Movement of cells of wild-type *F. johnsoniae* CJ1827 (Left), *gldJ* mutant CJ2386 which produces truncated (548 AAs) GldJ (Center), and CJ2386 complemented with pMM313 that expresses full length (561 AAs) GldJ (Right) on glass cover slips. Cells in MM were introduced into tunnel slides, incubated for 5 min, and cells on the cover slip were examined at 25°C. Three 30-second sequences are shown. Bar indicates 10 µm and applies to all movies.

**Movie S3.** Movement of cells of wild-type *F. johnsoniae* CJ1827 (Left), *gldJ* mutant CJ2443 which produces truncated (553 AAs) GldJ (Center), and CJ2443 complemented with pMM313 that expresses full length (561 AAs) GldJ (Right) on glass cover slips. Cells in MM were introduced into tunnel slides, incubated for 5 min, and cells on the cover slip were examined at 25°C. Three 30-second sequences are shown. Bar indicates 10 µm and applies to all movies.

**Movie S4.** Binding and movement of Protein G-coated polystyrene spheres. Protein G-coated 0.5 µm polystyrene spheres were added to cells of *F. johnsoniae* strains in MM plus 0.1% BSA with anti-SprB antibodies. The cells were introduced into tunnel slides and examined at 25°C. The three sequences shown correspond to 30 seconds each. From left to right: 1) Wild-type *F. johnsoniae* UW101 which makes full length GldJ (661 AA). 2) *gldJ* truncation mutant UW102-81 which makes truncated GldJ<sub>542</sub> (542 AA). 3) UW102-81 complemented with pMM313 that carries wild type *gldJ*. Cells were also incubated without anti-SprB, but failed to bind spheres as demonstrated in Fig. 10 of the main text. Green arrows indicate spheres that move along the length of a cell. No spheres attached to cells expressing GldJ<sub>542</sub>, presumably since there was no SprB on the cell surface (see Fig. 10 in the main text). Bar indicates 10 µm.

**Movie S5.** Binding and movement of Protein G-coated polystyrene spheres. Protein G-coated 0.5 µm polystyrene spheres were added to cells of *F. johnsoniae* strains in MM plus 0.1% BSA with anti-SprB antibodies. The cells were introduced into tunnel slides and examined at 25°C. The three sequences shown correspond to 30 seconds each. From left to right: 1) Wild-type *F. johnsoniae* CJ1827 which makes full length GldJ (661 AA). 2) *gldJ* truncation mutant CJ2386 which makes truncated GldJ<sub>548</sub> (548 AA). 3) CJ2386 complemented with pMM313 that carries wild type *gldJ*. Green arrows indicate spheres that move along the length of a cell. Red arrows indicate spheres that attach to a cell but fail to move along the cell. Bar indicates 10 µm.

**Movie S6.** Binding and movement of Protein G-coated polystyrene spheres. Protein G-coated 0.5 µm polystyrene spheres were added to cells of *F. johnsoniae* strains in MM plus 0.1% BSA with

anti-SprB antibodies. The cells were introduced into tunnel slides and examined at 25°C. The three sequences shown correspond to 30 seconds each. From left to right: 1) Wild-type *F. johnsoniae* CJ1827 which makes full length GldJ (661 AA). 2) *gldJ* truncation mutant CJ2443 which makes truncated GldJ<sub>553</sub> (553 AA). 3) CJ2443 complemented with pMM313 that carries wild type *gldJ*. Green arrows indicate spheres that move along the length of a cell. Red arrows indicate spheres that attach to a cell but fail to move along the cell. Bar indicates 10 µm.

**Table S1. Primers used in this study.**

| <b>Primer</b> | <b>Sequence and Description</b>                                                                       |
|---------------|-------------------------------------------------------------------------------------------------------|
| 21            | 5' ATTCGAGCTCTTCAGAAGTATAACCGATG 3'; used to amplify <i>gldA</i>                                      |
| 22            | 5' ATTATCTAGATGCTTGGCAAATATAACAC 3'; used to amplify <i>gldA</i>                                      |
| 1329          | 5' GCTAGGGATCCCTGAGCCTGTGTATTGTCTGAAACTAA 3'; used to construct pJJ07; BamHI site underlined          |
| 1330          | 5' GCTAGGTCGACCATTGACATCATTAATTGCAAGACTAC 3'; used to construct pJJ07; Sall site underlined           |
| 1331          | 5' GCTAGGTCGACGCAATGTCTAGAGTAGGTGCTAAACT 3'; used to construct pJJ07; Sall site underlined            |
| 1332          | 5' GCTAGGCATGCCAGGTAGAAGGTTTTGATGAAACG 3'; used to construct pJJ07; SphI site underlined              |
| 1360          | 5' GCTAGGGATCCGAAGCGGAAACCATCTCCTG 3'; used to construct pAB31; BamHI site underlined                 |
| 1361          | 5' GCTAGGCATGCTTAGAAACCTATGTAATCAGTTGCCAT 3'; used to construct pAB31; SphI site underlined           |
| 1502          | 5' GCTAGGGATCCCGTGAAGCTCCATTTATCTGAG 3'; used to construct pJJ10 and pJJ11; BamHI site underlined     |
| 1503          | 5' TAGGTCGACTTATCTAGACATTGCACATCTGAAACC 3'; used to construct pJJ10; Sall site underlined             |
| 1504          | 5' GCTAGGTCGACCATAAAAAATTCCAAATTCCAAAGCTG 3'; used to construct pJJ10 and pJJ11; Sall site underlined |
| 1505          | 5' GCTAGGCATGCCCAAATCAGGTACGAACAGCA 3'; used to construct pJJ10 and pJJ11; SphI site underlined       |
| 1506          | 5' CTAGTAATCGGCTGTGGTAAGTC 3'; <i>gldK</i> mRNA probe for qPCR                                        |
| 1507          | 5' AGTTCTTGTGGAGCATCTTCTA 3'; <i>gldK</i> mRNA probe for qPCR                                         |
| 1508          | 5' ATGGACGCAAGTCTGAACC 3'; 16s rRNA probe for qPCR                                                    |
| 1509          | 5' CGGAGTTAGCCGATCCTTATTC 3'; 16s rRNA probe for qPCR                                                 |
| 1555          | 5' TAGGTCGACTTAAGTTTTAGCACCTACTCTAGACATTG 3'; used to construct pJJ11; Sall site underlined           |
